# Supplementary material
Source: PubMed Central journal article supplement (PMC4975520)

### Supplemental Figure one

**NOD.ABD intrahepatic cell populations: major cell gates defined by light scatter.** (a) Intrahepatic cells were isolated as described in the Materials and Methods from the liver of 7-9 week old NOD.ABD and control B10.H2<sup>s7</sup> mice and “granulocyte”, “macrophage” and “lymphocyte” gate percentages were determined by light scatter as indicated and as defined by marker staining in (c below). (b) **NOD.ABD intrahepatic populations show an increase in the granulocyte gate.** The mean of three separate experiments is shown in (b) and one representative plot is shown in (a). P value determined by the unpaired T test.

(c) **Demonstration that the majority of cells in the Fsc/Ssc defined in the Fsc/Ssc defined “macrophage” gate (57.45%) are F4/80+CD11b+; whereas the majority of cells in the “granulocyte” gate (56.81%) are {F4/80-, Gr-1<sup>high</sup>, CD11b+}.** Intrahepatic cells were isolated as described in the Materials and Methods; cells stained

with antibodies to CD11b, F4/80, and Gr-1 and the cells in the respective light scatter gates (“macrophage” vs. “granulocyte” shown in (a) above) analyzed by flow cytometry. The studies shown here establishing the cellular gates are representative of more than ten experiments.

### **Supplemental Figure two**

**Intrahepatic T cell frequency and cell number in NOD.ABD mice.** (a-e) Lymphocytes were isolated from the liver, spleen and mesenteric lymph nodes (mLN) of five week old NOD.ABD and control B10.H2<sup>g7</sup> mice and stained with PE-CD4, PE-Cy5-CD8, and APC-TCR $\beta$ . Cell frequencies were analyzed by flow cytometry and are expressed as the percentage of CD4 or CD8 T cells in the lymphocyte gate (as defined in Supplemental Fig. 1a above). Absolute numbers of CD4 and CD8 T cells are shown as the means  $\pm$  SD. Each group included 7 to 8 mice. (\*, NOD.ABD vs. B10.H2<sup>g7</sup>,  $p < 0.05$ ). (f) The mean of three separate experiments comparing NOD.ABD and B10.H2<sup>g7</sup> intrahepatic NK, NKT, and B cell populations (as defined in Materials and methods) is shown. No statistically significant differences were found between NOD.ABD and B10.H2<sup>g7</sup> mice in the percentages of each cell subset.

# Supplemental Figure one

a.

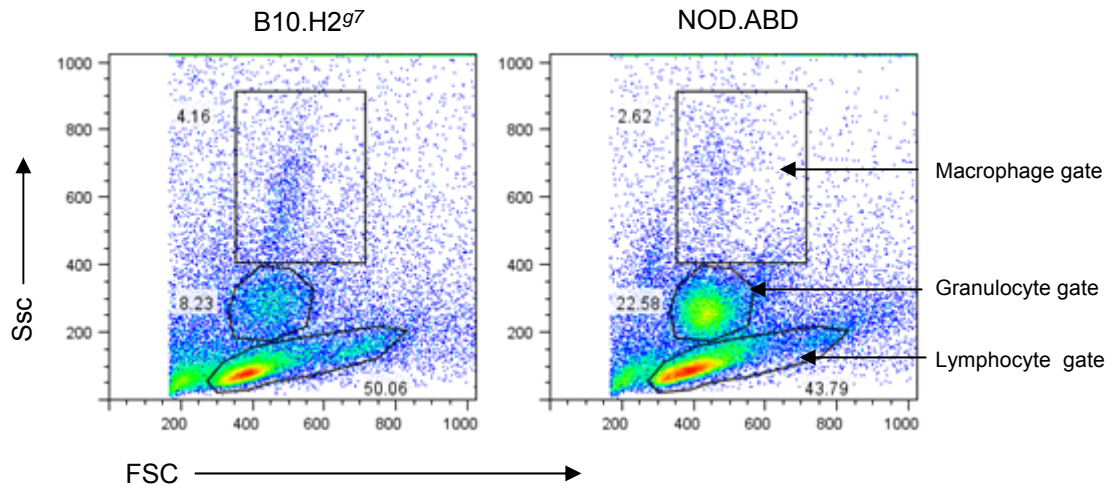

b.

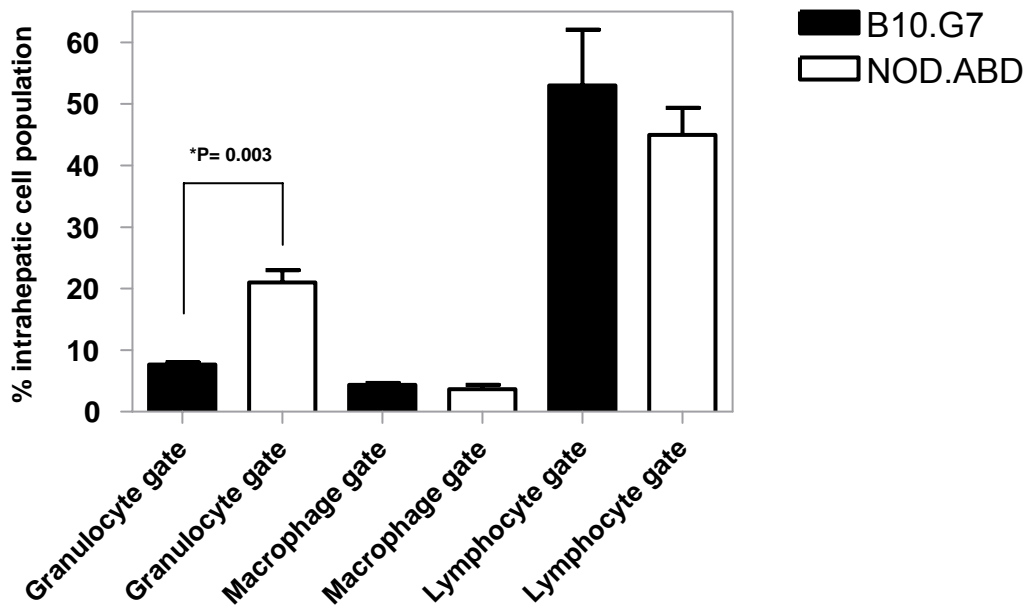

# Supplemental Figure one (cont)

c.

Macrophage gate

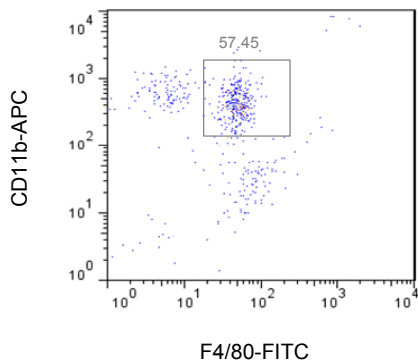

Granulocyte gate analysis

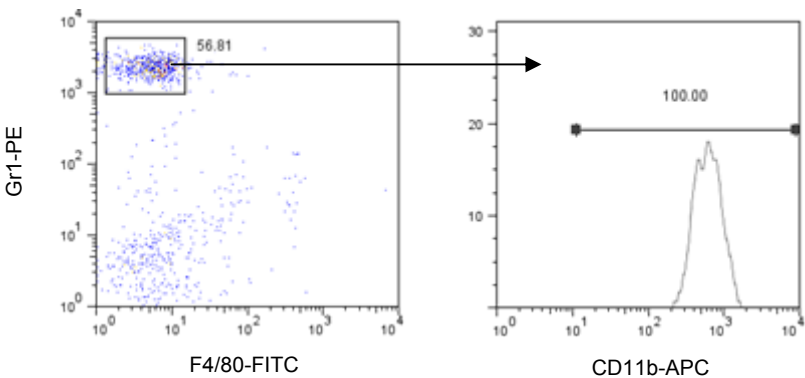

## Supplemental Figure two

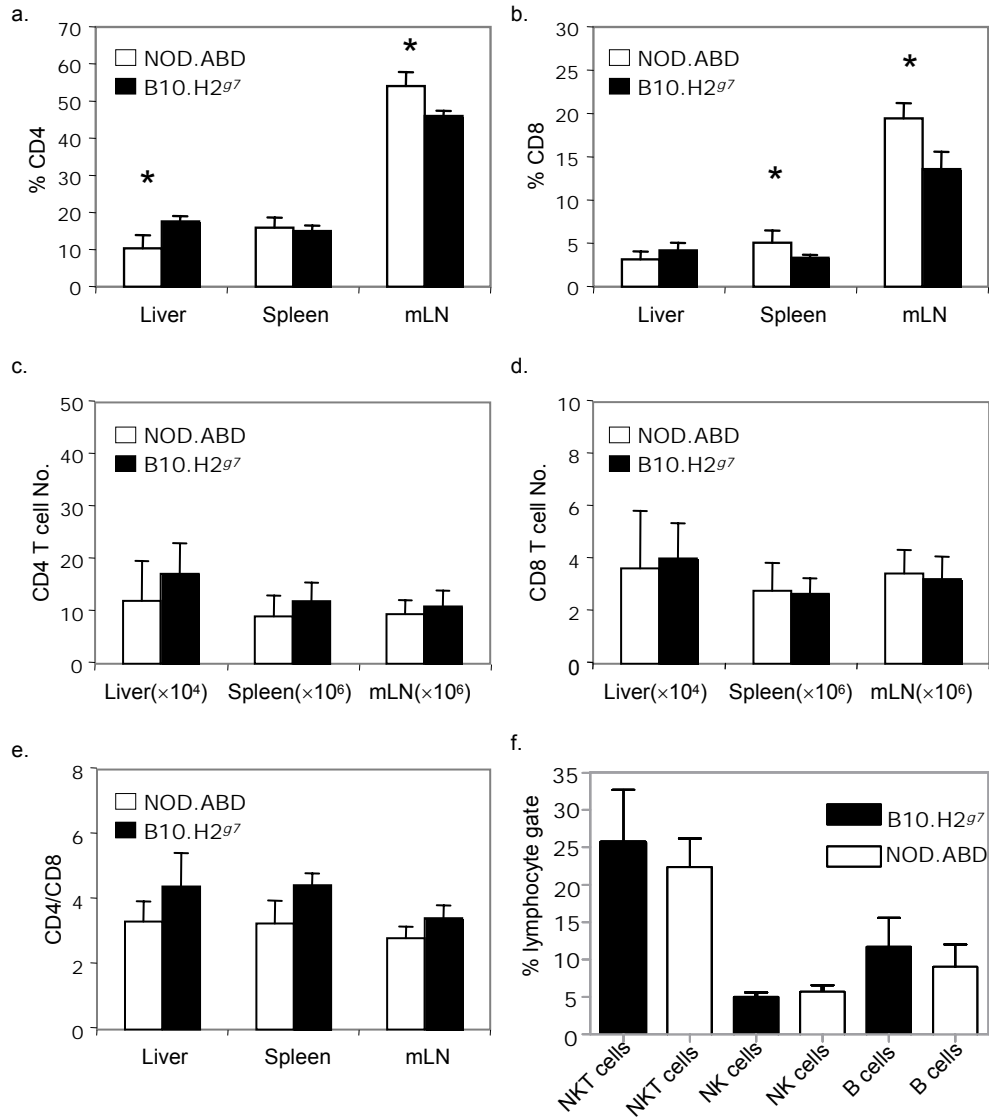

Supplement: NIHMS52323-supplement-Supplemental_Figures.pdf [file NIHMS52323-supplement-Supplemental_Figures.pdf]
